# Supplementary material
Source: PubMed Central journal article supplement (PMC3118752)
Supplement: supp_00262.2010_legends.pdf [file supp_00262.2010_legends.pdf]

SUPPL. FIG. S1. Array configuration and dimensions. *A*: Schematic grid representing the multi-electrode array configuration (4 rows made up of 6 electrodes each) and dimensions of the distances between electrodes. *B*: Photograph detailing inter-electrode distances for electrodes numbered 1 – 4 in *A*.

SUPPL. FIG. S2. Intra-RTN-pF functional connectivity. Cross-correlation feature summary diagram representing the central peaks (unfilled circles) and troughs (half-filled circles) detected in cross-correlation histograms calculated among RTN-pF neurons. 10: peak, DI = 24.05, 39,692 trigger and 21,095 target spikes; 11: trough, DI = 9.09, 134,779 trigger and 48,510 target spikes.
