# Supplementary material
Source: PubMed Central journal article supplement (PMC3118752)

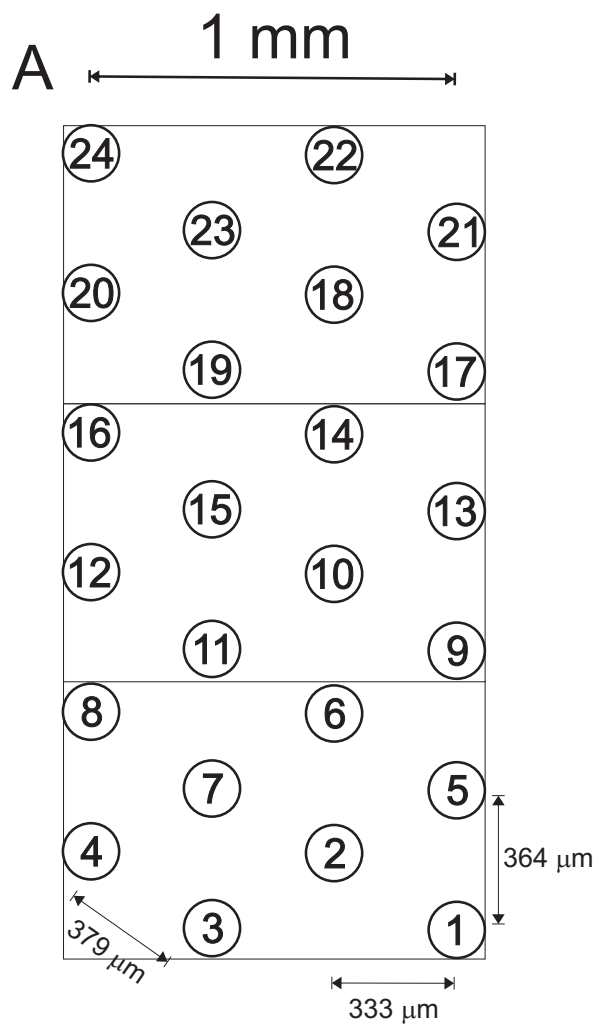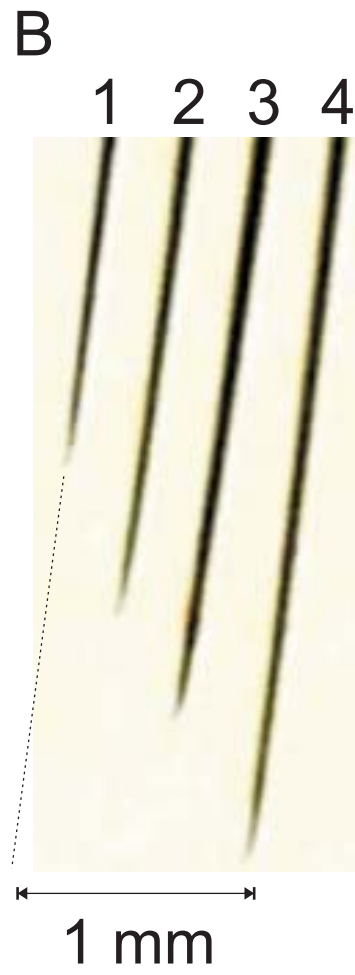

Supplement: supp_00262.2010_figS1.pdf [file supp_00262.2010_figS1.pdf]

# Central features

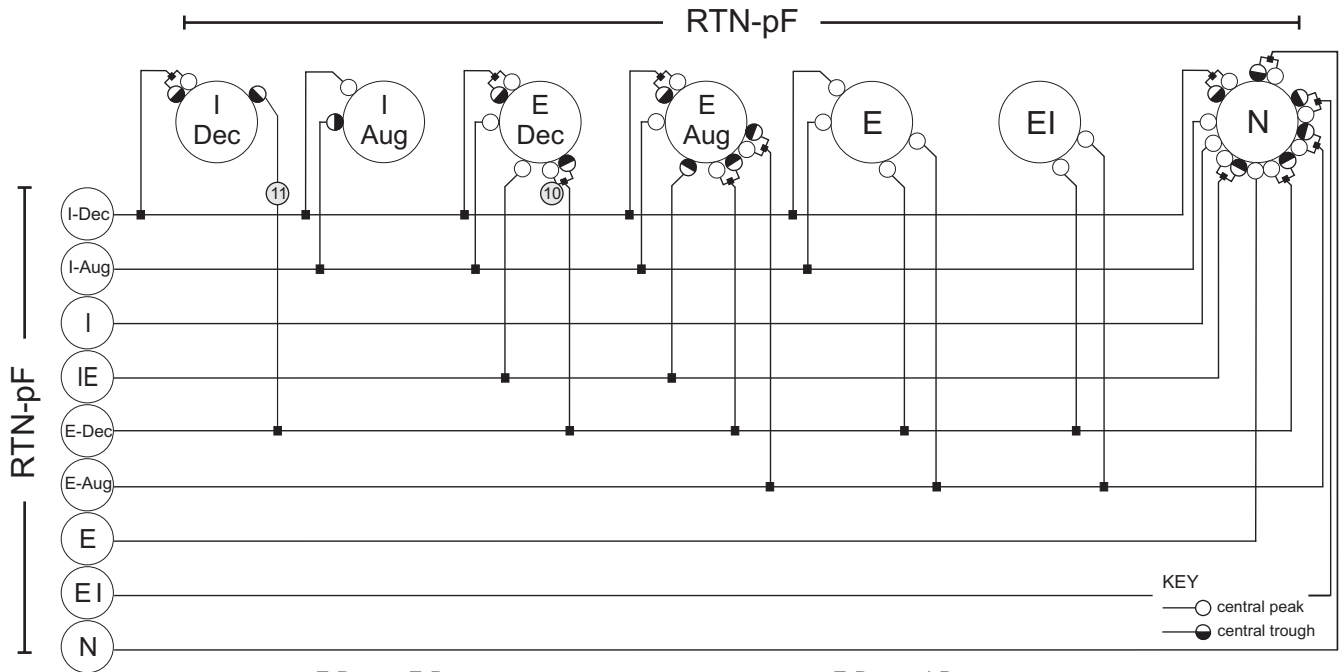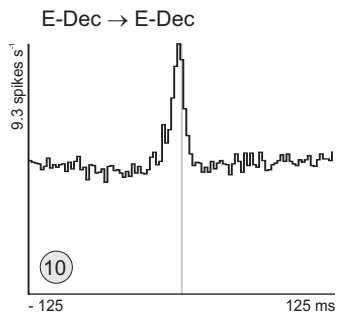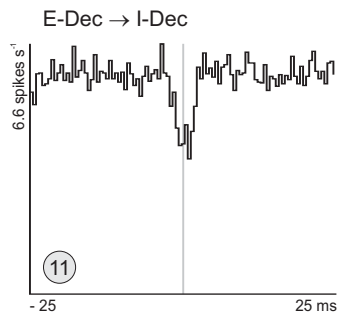

Supplement: supp_00262.2010_figS2.pdf [file supp_00262.2010_figS2.pdf]
